# Supplementary material for: A novel tunnel Na0.61Ti0.48Mn0.52O2 cathode material for sodium-ion batteries
Source: Royal Society of Chemistry journal article supplement (doi:10.1039/c4cc02362e), 2014-01-01
Supplement: c4cc02362e1.pdf [file c4cc02362e1.pdf]

## Supporting information

### **Novel tunnel $\text{Na}_{0.61}\text{Ti}_{0.48}\text{Mn}_{0.52}\text{O}_2$ cathode material for sodium-ion batteries**

**Shaohua Guo,<sup>a, b</sup> Haijun Yu,<sup>\* a</sup> Dequan Liu,<sup>c</sup> Wei Tian,<sup>c</sup> Xizheng Liu,<sup>a, b</sup> Nobuko Hanada,<sup>b</sup> Masayoshi Ishida<sup>b</sup> and Haoshen Zhou<sup>\* a, b, d</sup>**

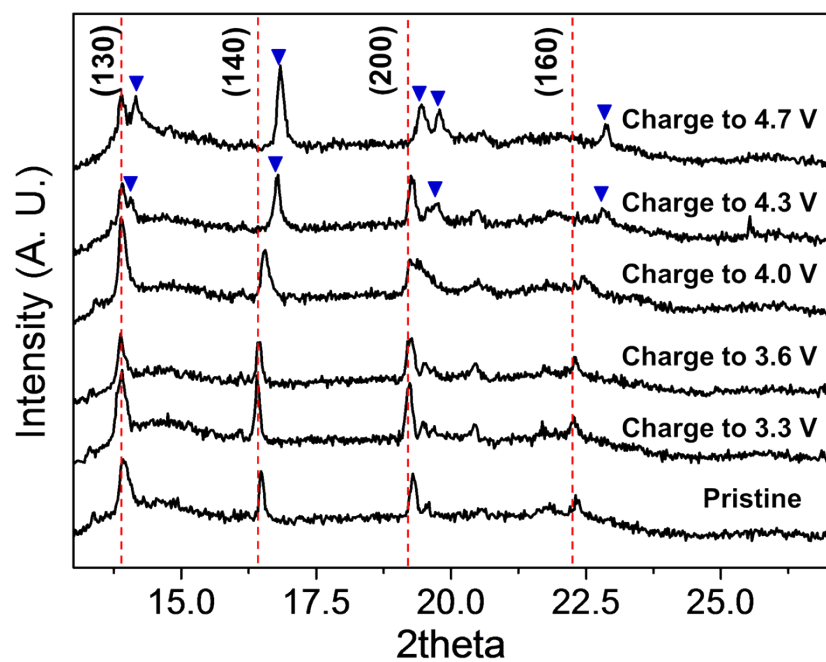

**Fig. S1** Ex-situ XRD patterns for tunnel  $\text{Na}_{0.61}\text{Ti}_{0.48}\text{Mn}_{0.52}\text{O}_2$  with the voltage range of 1.5-4.7 V in the initial charge process.
